# Supplementary material for: Effects of phenolic acids and quercetin-3-O-rutinoside on the bitterness and astringency of green tea infusion
Source: PubMed Central journal article supplement (PMC8795203; doi:10.1038/s41538-022-00124-8), 2022-01-27
Supplement: 41538_2022_124_MOESM1_ESM.pdf [file 41538_2022_124_MOESM1_ESM.pdf]

**Effects of phenolic acids and Que-rut  
on the bitterness and astringency of green tea**

**Supplementary table 1**

## Bitterness and astringency of green tea infusions

| Sample | Brand           | Bitterness | Astringency |
|--------|-----------------|------------|-------------|
| 1      | Pingyangtezao   | 3.00±0.07  | 2.95±0.07   |
| 2      | Maolv           | 3.08±0.11  | 3.05±0.07   |
| 3      | TR129           | 3.40±0.14  | 3.15±0.21   |
| 4      | Hanlv           | 3.78±0.04  | 3.33±0.04   |
| 5      | Anjibaicha      | 3.90±0.14  | 3.50±0.00   |
| 6      | Shuigucha       | 3.15±0.21  | 3.65±0.21   |
| 7      | Zhongcha NO.102 | 4.12±0.17  | 4.05±0.21   |
| 8      | Lanhai          | 5.55±0.07  | 5.05±0.07   |
| 9      | Fuyun NO.6      | 4.50±0.00  | 5.00±0.00   |
| 10     | Longjingziya    | 5.00±0.21  | 5.55±0.07   |
| 11     | Zhenong NO.138  | 5.10±0.21  | 5.50±0.00   |
| 12     | Gaoqiaojuye     | 5.23±0.11  | 5.75±0.07   |
| 13     | Zhangke NO.1    | 5.70±0.07  | 5.00±0.00   |
| 14     | Changbolv       | 6.00±0.00  | 5.83±0.11   |
| 15     | Liancha NO.2    | 6.03±0.04  | 5.90±0.14   |
| 16     | Dongting NO.301 | 5.85±0.07  | 6.00±0.00   |

Data are means (± SD) of three replicates.

**Supplementary table 2**

Concentrations of tea polyphenols in green tea infusions (mg/L)

| Sample | Tea polyphenols | Sample | Tea polyphenols |
|--------|-----------------|--------|-----------------|
| 1      | 949.15±2.77     | 9      | 2011.80±5.54    |
| 2      | 1201.60±5.54    | 10     | 2068.55±2.77    |
| 3      | 1334.67±11.07   | 11     | 2207.50±11.07   |
| 4      | 1348.37±8.30    | 12     | 2281.86±16.61   |
| 5      | 1438.40±13.84   | 13     | 2604.77±2.77    |
| 6      | 1608.65±11.07   | 14     | 2626.29±22.14   |
| 7      | 1761.30±11.07   | 15     | 2702.62±8.30    |
| 8      | 1972.66±11.07   | 16     | 2733.93±8.30    |

**Supplementary table 3**

## Concentrations of catechins in green tea infusions (mg/L)

| Sample | C          | GC          | CG        | GCG        | EC          | EGC         | ECG         | EGCG        | Total        |
|--------|------------|-------------|-----------|------------|-------------|-------------|-------------|-------------|--------------|
| 1      | 4.90±0.21  | 31.30±3.09  | 0.56±0.08 | 4.18±0.61  | 56.52±0.57  | 170.27±1.73 | 61.31±1.25  | 224.54±0.25 | 553.58±6.64  |
| 2      | 5.10±0.05  | 30.10±0.14  | 0.41±0.10 | 5.56±0.79  | 55.45±0.50  | 151.45±0.64 | 74.72±2.34  | 281.94±0.36 | 604.73±2.36  |
| 3      | 12.42±0.28 | 35.14±0.65  | 1.09±0.15 | 9.02±1.08  | 67.58±0.35  | 194.14±1.46 | 93.91±0.57  | 370.51±0.65 | 783.81±3.19  |
| 4      | 8.53±0.33  | 27.12±0.16  | 1.02±0.17 | 7.85±1.04  | 53.96±1.17  | 137.49±1.76 | 115.46±0.79 | 373.26±0.32 | 724.69±2.45  |
| 5      | 7.44±0.22  | 37.34±0.48  | 0.36±0.06 | 6.32±0.97  | 57.77±0.37  | 177.83±1.81 | 69.98±1.07  | 402.32±0.35 | 759.35±2.93  |
| 6      | 5.76±0.42  | 40.26±0.36  | 0.77±0.11 | 10.36±1.41 | 33.25±0.8   | 88.31±0.44  | 95.00±2.15  | 445.01±0.37 | 718.71±1.27  |
| 7      | 8.39±1.07  | 43.18±0.26  | 0.72±0.08 | 9.25±0.30  | 57.74±1.94  | 180.94±1.33 | 99.94±0.09  | 433.07±0.10 | 833.23±1.01  |
| 8      | 14.45±0.29 | 101.22±1.72 | 0.88±0.08 | 9.13±0.54  | 44.73±2.00  | 62.85±0.21  | 146.71±0.83 | 508.81±1.69 | 888.80±1.68  |
| 9      | 10.60±0.28 | 35.35±0.5   | 0.92±0.19 | 6.23±1.09  | 116.16±0.14 | 246.39±0.68 | 194.25±2.25 | 466.67±0.05 | 1076.57±3.34 |
| 10     | 14.71±0.18 | 41.10±2.76  | 1.11±0.16 | 10.60±0.98 | 91.30±0.01  | 283.36±2.01 | 184.53±0.24 | 591.12±0.36 | 1217.83±5.60 |
| 11     | 9.08±0.03  | 50.77±1.09  | 0.57±0.06 | 12.65±0.99 | 110.41±0.45 | 200.31±0.43 | 222.69±1.39 | 539.68±0.63 | 1146.16±1.00 |
| 12     | 23.18±0.25 | 81.99±0.02  | 2.18±0.05 | 31.21±0.32 | 90.47±0.07  | 312.77±0.32 | 127.08±2.20 | 634.13±0.19 | 1303.01±1.85 |
| 13     | 23.59±0.00 | 50.51±1.33  | 2.64±0.18 | 27.67±0.93 | 88.12±0.49  | 233.01±2.34 | 202.90±0.61 | 756.57±0.27 | 1385.02±4.40 |
| 14     | 17.71±0.51 | 70.78±0.31  | 2.79±0.09 | 26.29±1.35 | 96.61±0.42  | 276.87±1.63 | 194.16±0.39 | 755.91±0.32 | 1441.12±2.53 |
| 15     | 9.54±0.51  | 47.00±3.10  | 2.26±0.18 | 24.54±1.85 | 55.99±0.24  | 141.84±2.57 | 165.48±1.33 | 674.09±0.11 | 1120.74±8.86 |
| 16     | 17.05±0.33 | 85.96±0.87  | 3.18±0.15 | 30.76±0.98 | 116.31±0.68 | 373.58±1.14 | 201.67±0.18 | 749.99±2.53 | 1578.51±0.59 |

**Supplementary table 4**

## Concentration of flavonoids in green tea infusions (mg/L)

| Sample | Kae       | Kae-rut    | Kae-glu   | Que       | Que-rha    | Que-rut   | Que-glu   | Que-gala  | Myr-rha   | Myr-gala  | Vit       | Vit-rha   | Total      |
|--------|-----------|------------|-----------|-----------|------------|-----------|-----------|-----------|-----------|-----------|-----------|-----------|------------|
| 1      | 0.48±0.04 | 3.38±0.13  | 0.49±0.28 | 0.17±0.00 | 0.48±0.09  | 1.13±0.06 | 0.68±0.04 | 0.60±0.24 | 0.40±0.03 | 0.40±0.04 | 0.33±0.00 | 0.46±0.01 | 9.02±0.24  |
| 2      | 0.43±0.08 | 3.16±0.25  | 0.23±0.13 | 0.93±0.06 | 1.03±0.11  | 1.24±0.10 | 0.79±0.12 | 0.96±0.14 | 1.26±0.72 | 0.76±0.17 | 0.16±0.03 | 0.93±0.02 | 11.88±0.60 |
| 3      | 0.94±0.02 | 1.75±0.09  | 0.64±0.64 | 1.29±0.04 | 5.26±0.11  | 0.52±0.13 | 1.28±0.29 | 1.69±0.06 | 0.47±0.29 | 1.53±0.17 | 0.22±0.02 | 1.05±0.03 | 16.65±1.51 |
| 4      | 0.31±0.01 | 3.63±0.01  | 0.46±0.39 | 1.09±0.14 | 0.74±0.01  | 2.67±0.39 | 1.14±0.93 | 0.98±0.02 | 2.34±0.29 | 0.88±0.01 | 0.05±0.01 | 0.79±0.01 | 15.07±1.10 |
| 5      | 0.88±0.02 | 2.44±0.02  | 0.41±0.13 | 0.09±0.03 | 2.48±0.69  | 2.39±0.06 | 1.80±1.59 | 0.98±0.89 | 2.58±0.38 | 2.18±0.16 | 0.09±0.06 | 0.85±0.05 | 17.17±1.18 |
| 6      | 0.68±0.05 | 2.93±1.40  | 0.69±0.89 | 0.17±0.12 | 5.20±0.29  | 0.71±0.44 | 2.24±0.67 | 0.97±0.39 | 0.37±0.05 | 1.12±0.10 | 0.41±0.01 | 0.59±0.17 | 16.07±2.44 |
| 7      | 0.95±0.09 | 2.86±0.30  | 0.45±0.45 | 1.20±0.02 | 5.46±0.31  | 1.56±0.91 | 0.52±0.72 | 1.33±0.10 | 0.75±0.70 | 2.69±0.41 | 0.41±0.01 | 1.07±0.01 | 19.26±1.12 |
| 8      | 0.95±0.01 | 17.54±1.53 | 0.69±0.85 | 0.05±0.00 | 1.78±1.88  | 4.57±0.37 | 0.94±0.53 | 0.47±0.27 | 1.29±0.27 | 0.44±0.12 | 0.01±0.01 | 1.03±0.03 | 29.75±2.05 |
| 9      | 1.47±0.01 | 23.32±0.74 | 0.28±0.16 | 0.88±0.02 | 13.33±0.47 | 7.43±0.22 | 2.12±0.17 | 0.93±0.09 | 7.36±0.51 | 0.77±0.05 | 0.07±0.01 | 0.80±0.00 | 58.76±1.79 |
| 10     | 0.97±0.05 | 3.44±0.14  | 0.57±0.73 | 0.52±0.04 | 7.15±0.03  | 1.06±0.57 | 2.06±0.00 | 0.86±0.65 | 1.20±0.10 | 2.49±0.21 | 0.16±0.13 | 1.39±0.01 | 21.87±1.98 |
| 11     | 1.32±0.17 | 18.41±0.15 | 0.48±0.38 | 0.37±0.34 | 1.02±0.03  | 3.11±0.15 | 1.34±0.18 | 0.60±0.00 | 8.22±0.31 | 0.66±0.29 | 0.33±0.02 | 1.38±0.04 | 37.25±0.89 |
| 12     | 1.19±0.07 | 9.18±0.57  | 0.86±1.04 | 0.47±0.24 | 3.27±0.05  | 2.46±0.88 | 1.21±0.14 | 0.67±0.13 | 1.24±0.33 | 2.55±0.23 | 2.42±0.15 | 1.30±0.13 | 26.82±1.97 |
| 13     | 1.00±0.03 | 3.77±0.31  | 1.28±1.72 | 0.41±0.20 | 1.14±1.04  | 2.84±0.33 | 0.95±0.20 | 1.28±0.85 | 1.23±0.78 | 1.58±0.08 | 0.48±0.05 | 1.74±0.11 | 17.72±3.11 |
| 14     | 1.14±0.04 | 3.94±0.46  | 0.74±0.70 | 0.81±0.65 | 5.08±0.09  | 3.46±0.65 | 1.93±0.52 | 0.62±0.38 | 2.48±0.33 | 2.25±0.02 | 0.35±0.01 | 1.20±0.02 | 24.01±0.11 |
| 15     | 1.68±0.07 | 18.91±0.35 | 0.65±0.75 | 0.55±0.62 | 0.60±0.01  | 7.17±0.23 | 0.86±0.42 | 0.84±0.73 | 3.58±1.37 | 1.29±0.19 | 0.22±0.00 | 1.05±0.07 | 37.39±1.87 |
| 16     | 1.23±0.01 | 4.73±0.37  | 0.49±0.43 | 0.77±0.77 | 10.78±0.13 | 3.90±1.38 | 3.70±0.17 | 0.94±0.23 | 1.68±1.51 | 3.98±0.10 | 0.53±0.07 | 1.22±0.08 | 33.95±2.70 |

Kae, kaempferol; Kae-rut, kaempferol-3-O-rutinoside; Kae-glu, kaempferol-3-O-glucoside; Que, quercetin; Que-rha, quercetin-3-O-rhamnoside; Que-rut, quercetin-3-O-rutin; Que-glu, quercetin-3-O-glucoside; Que-gala, quercetin-3-O-galactoside; Myr-rha, myricetin-3-O-rhamnoside; Myr-gala, myricetin-3-O-galactoside; Vit, vitexin; Vit-rha, vitexin-2-O-rhamnoside

**Supplementary table 5**

Concentration of phenolic acids in green tea infusions (mg/L)

| Tea NO. | Gallic acid | Chlorogenic acid | Caffic acid | Total       |
|---------|-------------|------------------|-------------|-------------|
| 1       | 6.57±0.13   | 0.65±0.50        | 0.0018±0.00 | 7.22±0.37   |
| 2       | 9.00±0.02   | 0.99±0.54        | 0.0017±0.00 | 9.98±0.56   |
| 3       | 7.47±0.23   | 0.78±0.71        | 0.0053±0.00 | 8.25±0.49   |
| 4       | 8.14±0.21   | 0.17±0.05        | 0.0031±0.00 | 8.31±0.15   |
| 5       | 7.37±0.29   | 1.07±1.16        | 0.0034±0.00 | 8.44±1.46   |
| 6       | 11.53±0.92  | 3.77±1.73        | 0.0142±0.01 | 15.31±0.83  |
| 7       | 14.76±0.64  | 0.61±0.38        | 0.0015±0.00 | 15.37±0.26  |
| 8       | 12.55±0.45  | 2.25±2.81        | 0.0019±0.00 | 14.80±2.37  |
| 9       | 10.34±0.08  | 11.29±13.19      | 0.0024±0.00 | 21.63±13.11 |
| 10      | 8.37±0.31   | 6.67±8.09        | 0.0023±0.00 | 15.04±7.79  |
| 11      | 13.13±0.27  | 5.53±3.64        | 0.0016±0.00 | 18.66±3.37  |
| 12      | 10.46±0.17  | 9.93±10.59       | 0.0017±0.00 | 20.39±10.76 |
| 13      | 12.07±0.24  | 2.35±2.09        | 0.0028±0.00 | 14.42±1.85  |
| 14      | 15.27±0.17  | 9.78±10.81       | 0.0045±0.00 | 25.05±10.98 |
| 15      | 21.54±0.26  | 0.59±0.58        | 0.0015±0.00 | 22.14±0.84  |
| 16      | 12.81±0.09  | 5.82±6.29        | 0.0009±0.00 | 18.64±6.38  |
